# Supplementary material
Source: HighWire-hosted journal article supplement (https://cmajopen.ca/highwire/filestream/89603/field_highwire_adjunct_files/1/open-2022-0045-2-at.pdf)
Supplement: open-2022-0045-2-at.pdf [file open-2022-0045-2-at.pdf]

**Supplementary Table 2:** Results of SARS-CoV-2 sero-screening by time-period for all provinces. Shown as raw prevalence per 100. Assays vary by province

| Province | Seroprevalence | Lower 95%CI | Upper 95%CI | Time period |
|----------|----------------|-------------|-------------|-------------|
| AB       | 0.43           | 0.22        | 0.75        | Feb 2020    |
| AB       | 1.57           | 1.16        | 2.08        | Aug 2020    |
| AB       | 2.07           | 1.63        | 2.59        | Nov 2020    |
| AB       | 9.18           | 8.11        | 10.35       | Nov 2021    |
| BC       | 0.07           | 0.01        | 0.24        | Feb 2020    |
| BC       | 0.34           | 0.12        | 0.73        | Aug 2020    |
| BC       | 2.14           | 1.63        | 2.74        | Nov 2020    |
| BC       | 3.53           | 2.93        | 4.21        | Nov 2021    |
| MB       | 4.28           | 1.86        | 8.26        | Nov 2020    |
| NB       | 1.01           | 0.12        | 3.60        | Nov 2020    |
| NL       | 0.00           | 0.00        | 10.58       | Aug 2020    |
| NL       | 0.33           | 0.01        | 1.80        | Nov 2020    |
| NL       | 1.11           | 0.23        | 3.20        | Nov 2021    |
| NS       | 0.41           | 0.05        | 1.47        | Aug 2020    |
| NS       | 1.41           | 0.57        | 2.88        | Nov 2020    |
| ON       | 3.86           | 3.39        | 4.38        | Nov 2020    |
| PEI      | 1.11           | 0.03        | 6.04        | Nov 2020    |
| PEI      | 15.00          | 8.65        | 23.53       | Nov 2021    |

**Supplementary Table 2:** Results of SARS-CoV-2 sero-screening by time-period for all provinces. Shown as raw prevalence per 100. Assays vary by province

| <b>Province</b> | <b>Seroprevalence</b> | <b>Lower 95%CI</b> | <b>Upper 95%CI</b> | <b>Time period</b> |
|-----------------|-----------------------|--------------------|--------------------|--------------------|
| QC              | 5.38                  | 4.19               | 6.80               | Nov 2020           |
| SK              | 0.18                  | 0.01               | 1.02               | Feb 2020           |
| SK              | 0.66                  | 0.18               | 1.68               | Aug 2020           |
| SK              | 1.81                  | 1.06               | 2.88               | Nov 2020           |
